# Supplementary material for: Humic Acid Improves Zn Fertilization in Oxisols Successively Cultivated with Maize–Brachiaria
Source: MDPI journal article supplement (doi:10.3390/molecules26154588), 2021-07-29

# Supplementary material

Supplementary material 1. The Pearson’s linear correlation matrix for soil attributes and maize traits. \* and \*\* significant relationship of soil and plant attributes at  $p < 0.05$  and  $p < 0.01$ , respectively; blue ellipse with right sloping top: positive relationship; red ellipse with left sloping top: negative correlation. SDM, RDM and TDM: shoot, root and total dry matter production, respectively; R:S ratio: ratio of shoot over (SDM) over root dry matter (RDM); Zn accumulation: Zn accumulated in maize shoots.

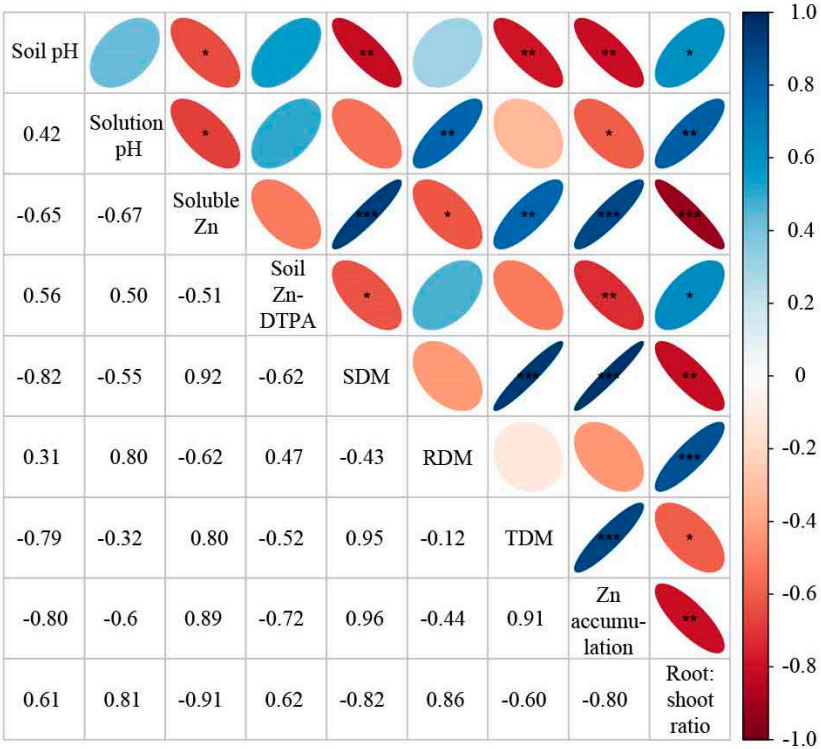

Supplementary material 2. The Pearson’s linear correlation matrix for soil attributes and brachiaria traits. \* and \*\* significant relationships between soil and plant traits at  $p < 0.05$  and  $p < 0.01$ , respectively; blue ellipse with right sloping top: positive correlation; red ellipse with left sloping top: negative correlation. SDM, RDM and TDM: brachiaria shoot, root and total dry matter production, respectively; R:S ratio: ratio of shoot (SDM) over root dry matter (RDM); Zn accumulation: Zn accumulated in brachiaria shoots.

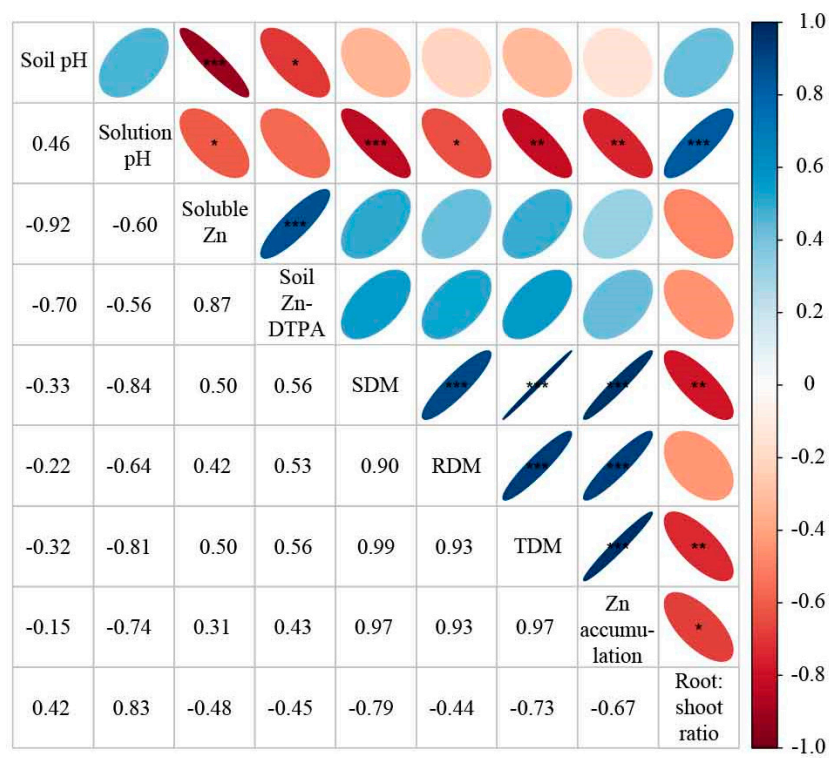

Supplement: s1 [file s1]
